# Supplementary material
Source: JCI journal article supplement (doi:10.1172/jci171806)
Supplement: sd1 [file 1]

## SUPPLEMENTARY INFORMATION

### ANTIGEN-SPECIFIC DECIDUAL CD8+ T CELLS INCLUDE DISTINCT EFFECTOR MEMORY AND TISSUE RESIDENT MEMORY CELLS

Shweta Mahajan, Aria Alexander Zachary Koenig, Nicolas Saba, Nina Prasanphanic, David A. Hildeman, Claire A. Chougnnet, Emily DeFranco, Sandra Andorf and Tamara Tilburgs

#### List of Supplementary Figures and Tables

Supplementary Figure S1: Gating Strategy

Supplementary Figure S2: Multidimensional Scaling Plots (MDS) separate CD8+ T cells by tissue type and not by batch.

Supplementary Figure S3: Non redundancy score (NRS) are used to select markers for clustering.

Supplementary Figure S4: Cluster 1 and 3 are phenotypically identical

Supplementary Figure S5: Expression profiles of FlowSOM clusters

Supplementary Figure S6: Cell Frequency per cluster are not different between decidua basalis and decidua parietalis nor between non pregnant and pregnant blood CD8+ T cells.

Supplementary Figure S7: Blood and decidual CD8+ T cell clusters have distinct expression of cytolytic granules.

Supplementary Figure S8: Virus-specific CD8+ T cells are distinct in blood and decidua

Supplementary Figure S9: Decidual virus- and fetus-specific CD8+ T cells have similar features of inhibition and cytotoxicity

Supplementary Figure S10: Decidual CD8+ T<sub>EM</sub> and T<sub>RM</sub> clusters have distinct cytokine secretion profiles.

Supplementary Figure S11: Decidual CD8+ T<sub>EM</sub> and T<sub>RM</sub> clusters have distinct levels of poly-functionality

Supplementary Table S1: 21 Parameter Cytex Aurora panel.

Supplementary Table S2: Sorting of CD8+ T cell clusters for functional testing.

Supplementary Table S3: List of antibodies used.

## A) Decidua

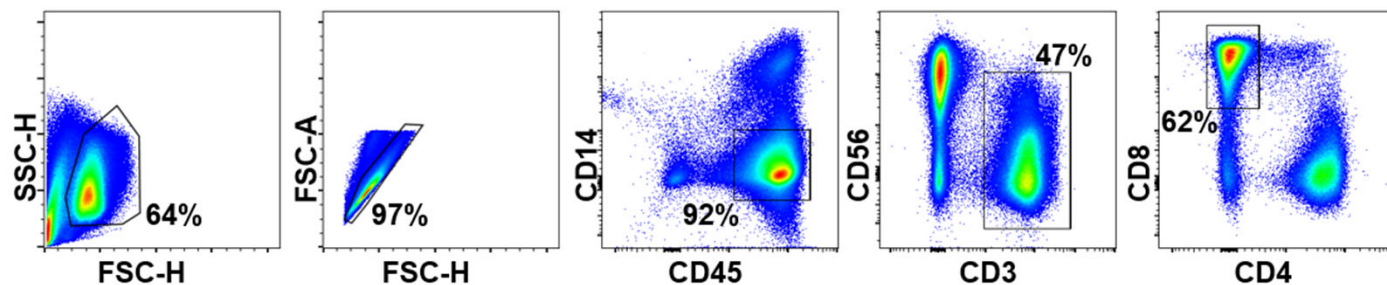

## B) Blood

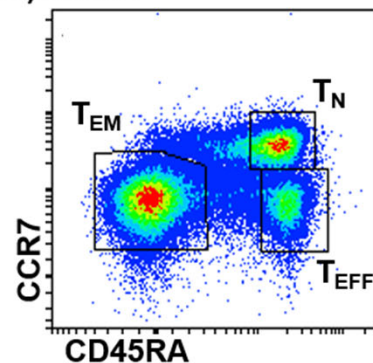

## C) Decidua

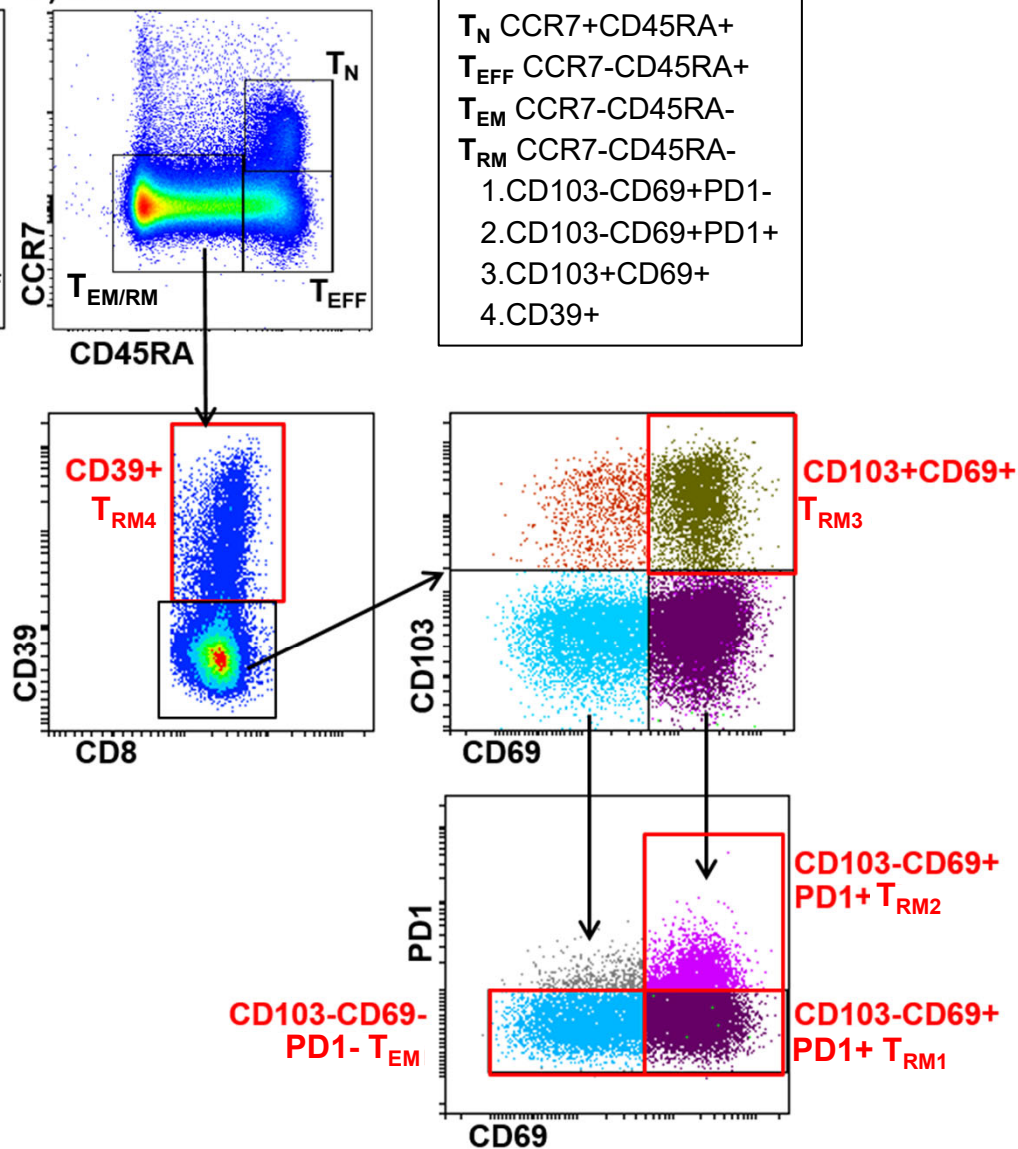

## Supplementary Figure S1. Gating Strategy

A) CD8<sup>+</sup> T cells were selected by gating on live and single cells. CD45<sup>+</sup> CD14<sup>-</sup> CD56<sup>-</sup> CD3<sup>+</sup> CD4<sup>-</sup> CD8<sup>+</sup> cells were selected in subsequent plots. B) Peripheral blood CD8<sup>+</sup> T cells were purified into CD45RA<sup>+</sup>CCR7<sup>+</sup> Naïve (T<sub>N</sub>), CD45RA<sup>+</sup>CCR7<sup>+</sup> Effector (T<sub>EFF</sub>), and CD45RA<sup>-</sup>CCR7<sup>-</sup> Effector-Memory (T<sub>EM</sub>) CD8<sup>+</sup> T cells by FACS sort. C) Decidual CD8<sup>+</sup> T cells were purified into CD45RA<sup>+</sup>CCR7<sup>+</sup> Naïve (T<sub>N</sub>), CD45RA<sup>+</sup>CCR7<sup>+</sup> Effector (T<sub>EFF</sub>) CD8<sup>+</sup> T cells, CD45RA<sup>-</sup>CCR7<sup>-</sup> CD8<sup>+</sup> Effector-Memory (T<sub>EM</sub>) and four types of CD45RA<sup>-</sup>CCR7<sup>-</sup> Resident-Memory (T<sub>RM</sub>)CD8<sup>+</sup> T cells based on the expression of CD39<sup>+</sup> (T<sub>RM4</sub>); CD39<sup>-</sup>CD103<sup>+</sup>CD69<sup>+</sup> (T<sub>RM3</sub>); CD39<sup>-</sup>CD103<sup>-</sup>CD69<sup>+</sup>PD1<sup>-</sup> (T<sub>EM1</sub>); and CD39<sup>-</sup>CD103<sup>-</sup>CD69<sup>+</sup>PD1<sup>+</sup> (T<sub>EM2</sub>) populations.

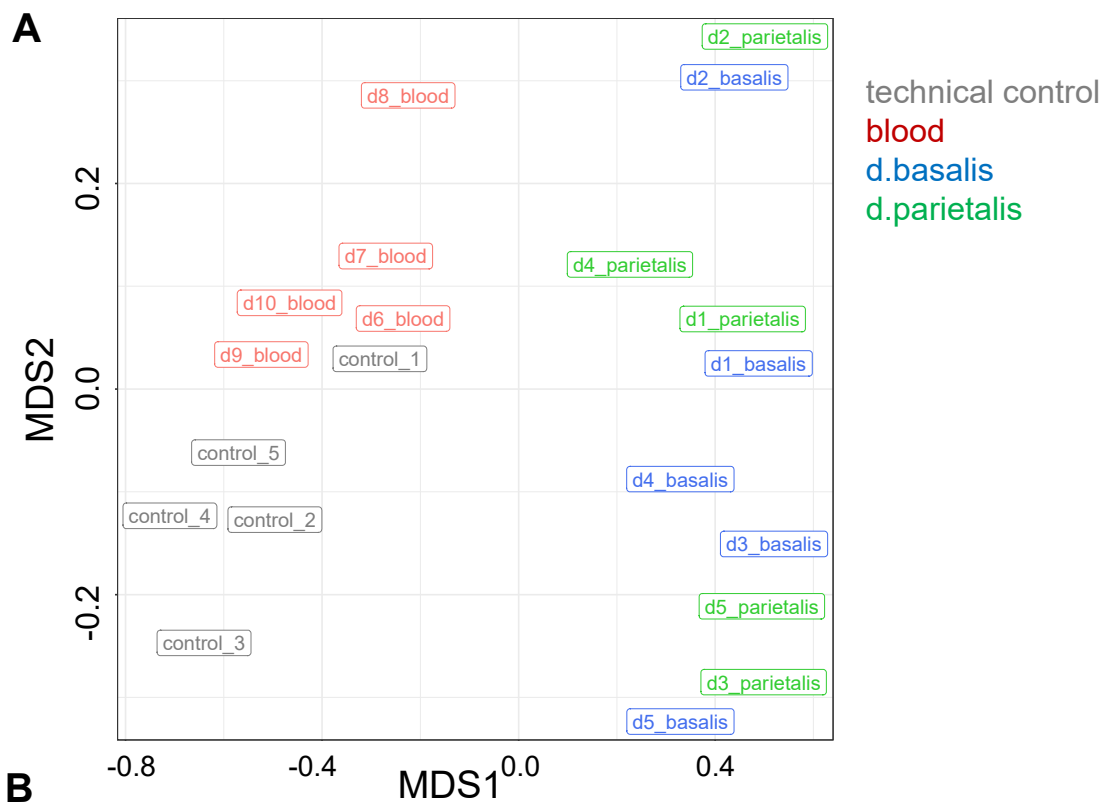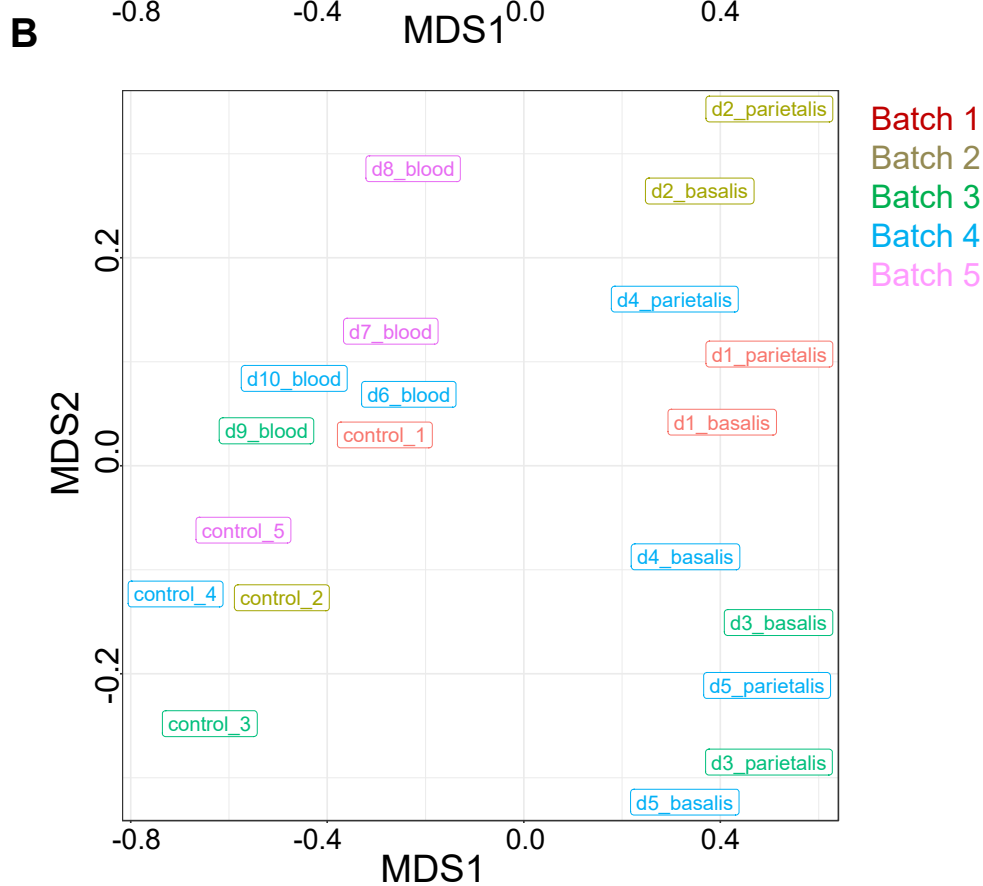

**Supplementary Figure S2. Multidimensional Scaling Plots (MDS)**  
 MDS plots separate CD8+ T cells by tissue type (A) and not by batch (B).

**A**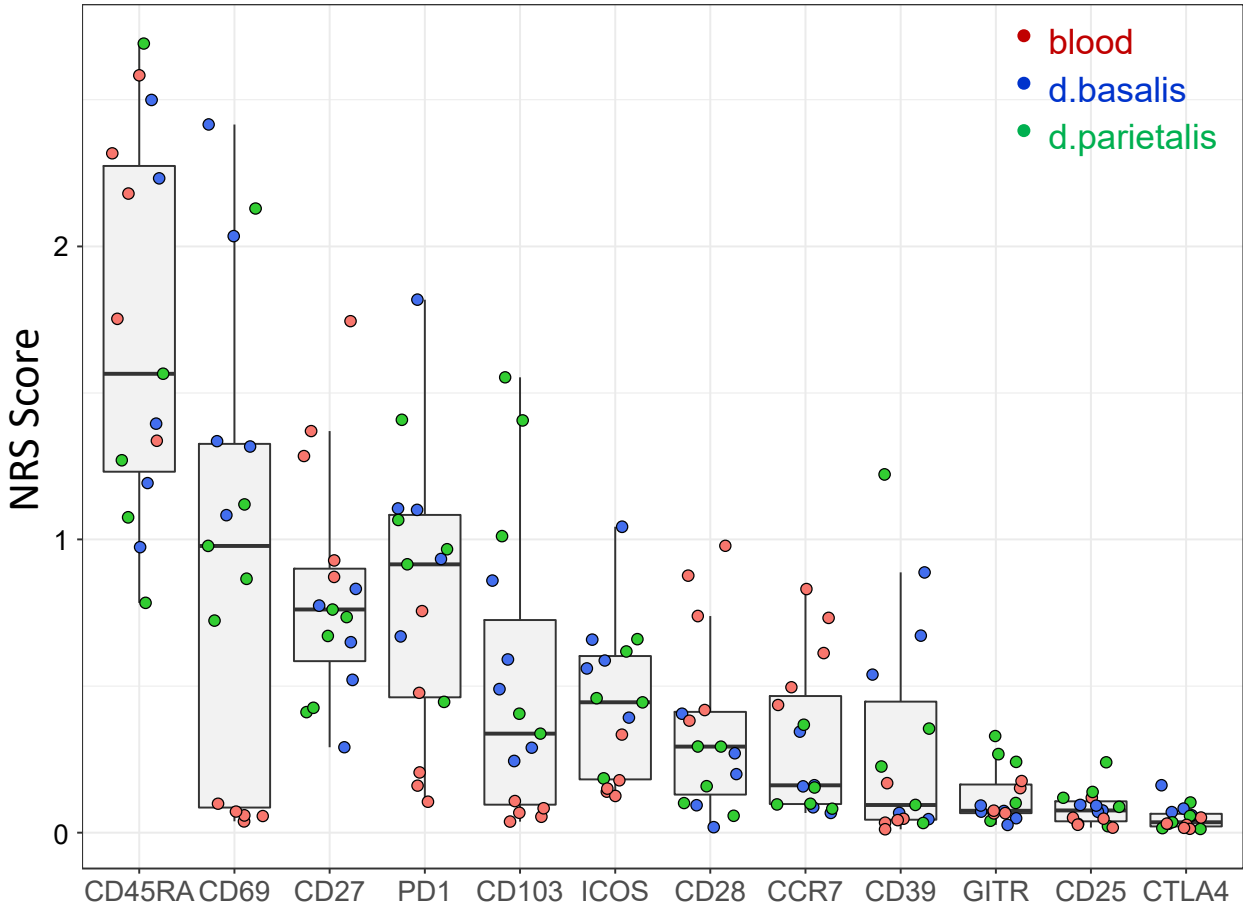**B**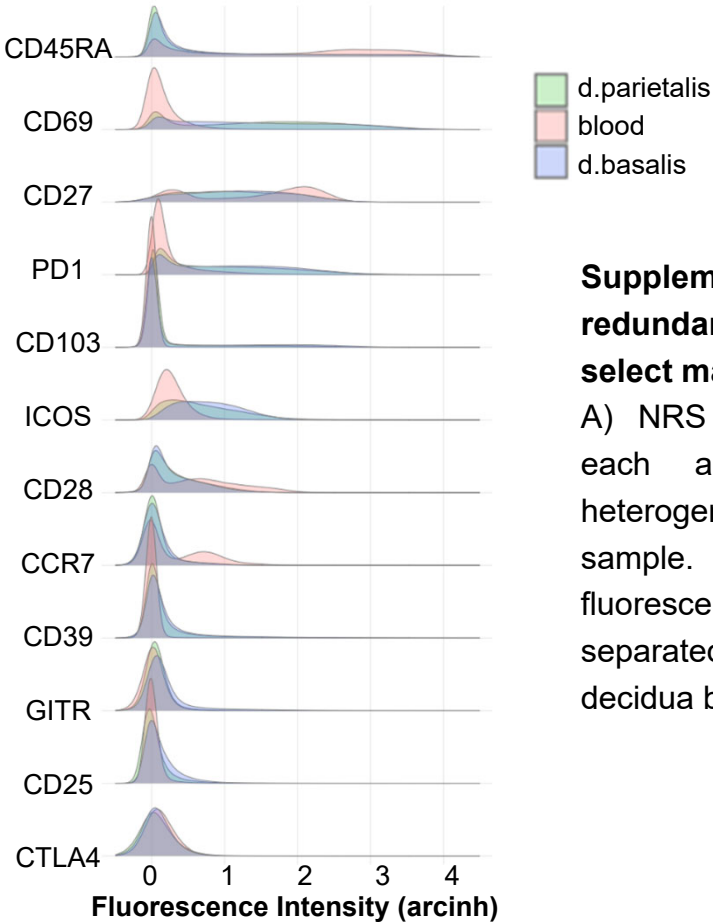

**Supplementary Figure S3. Non redundancy score (NRS) are used to select markers for clustering**

A) NRS plot depicts contribution of each antigen to CD8+ T cell heterogeneity. Each dot represents one sample. B) Density plots depict fluorescence intensity of each marker separated by tissue type (blood, decidua basalis and decidua parietalis)

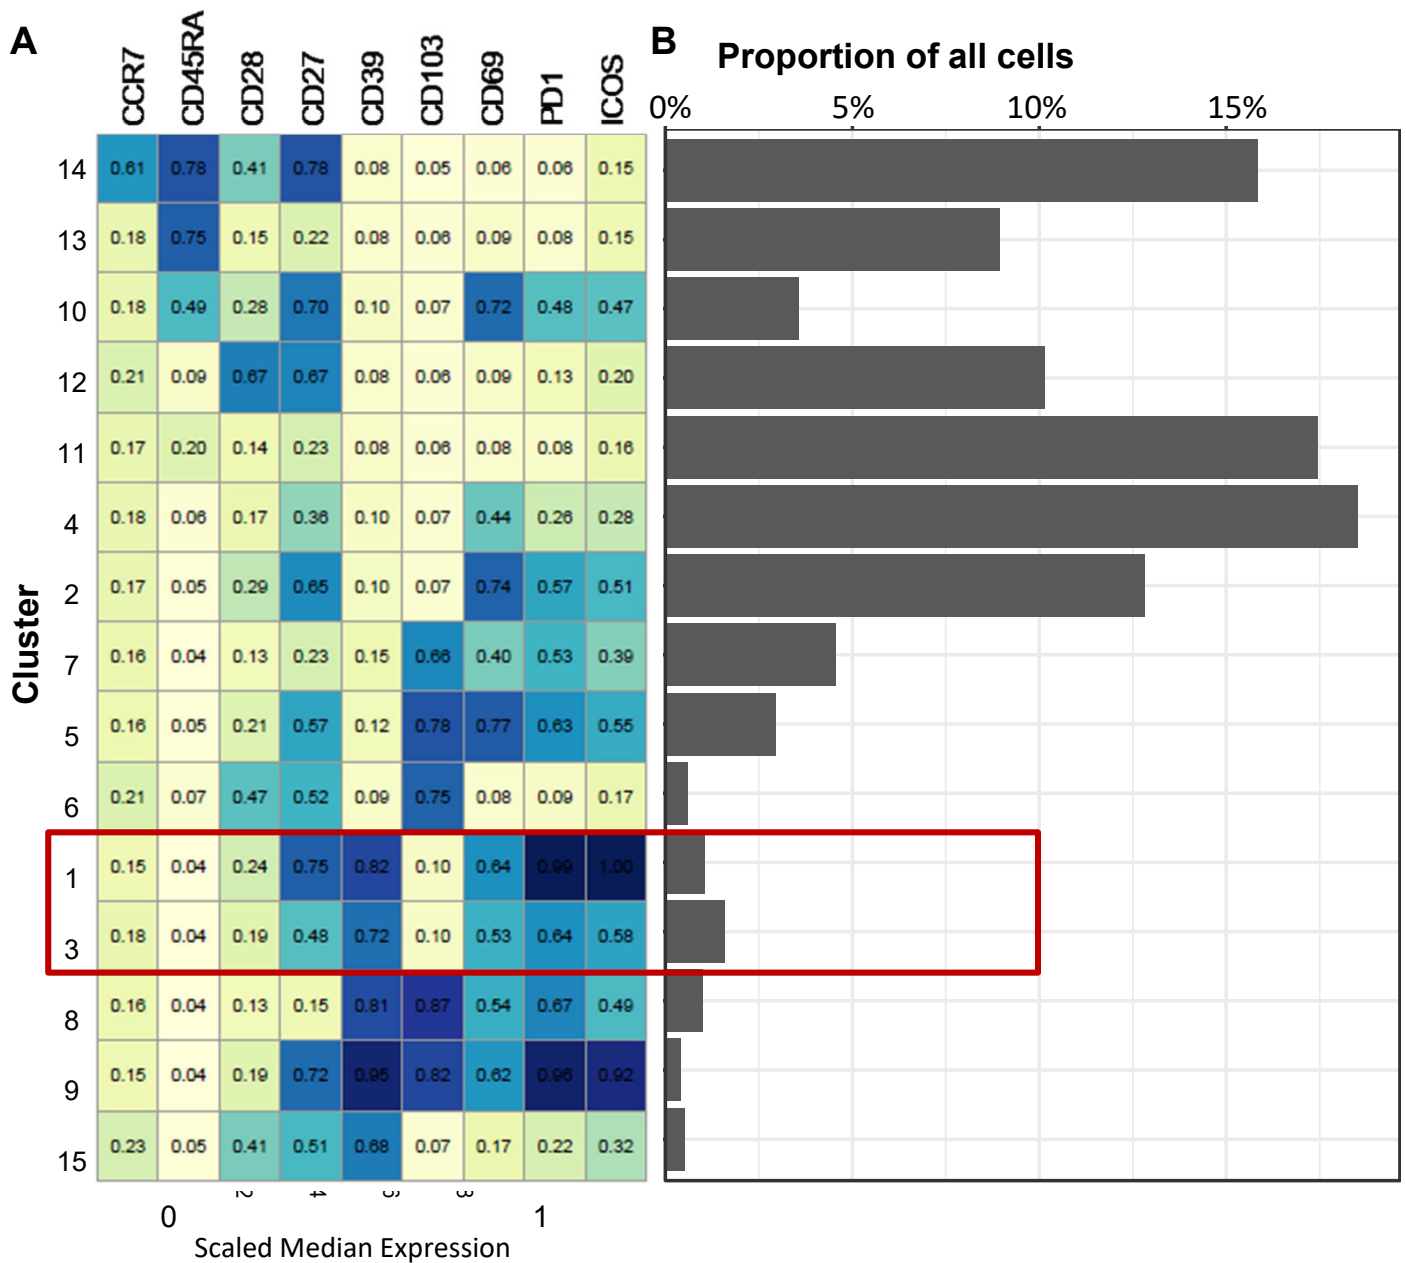

**Supplementary Figure S4. Cluster 1 and 3 are phenotypically identical**

15 FlowSOM populations were generated based on expression profiles of CD45<sup>+</sup>CD14<sup>-</sup>CD56<sup>-</sup>CD3<sup>+</sup>CD4<sup>-</sup>CD8<sup>+</sup> T cells from the blood (n=5), decidua basalis (n=5) and decidua parietalis (n=5). A) Heat map shows the arcsinh transformed scaled median fluorescence intensity of the specified markers for the 15 FlowSOM populations. B) Graph depicts the frequency of cells in each cluster as percentage of all analyzed cells. The red box identifies 2 small clusters, cluster 1 and cluster 3 that are phenotypically identical and therefore merged into cluster 1 for further analysis.

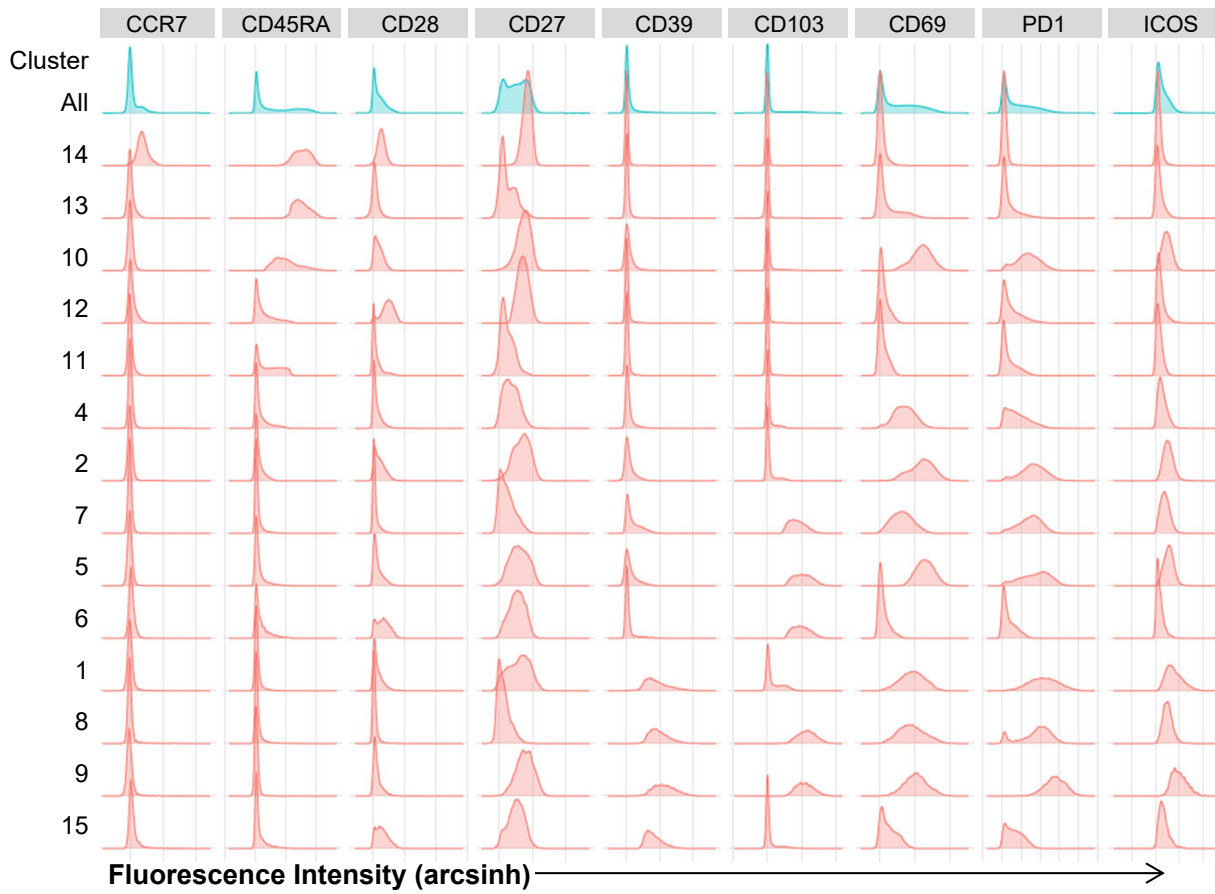

**Supplementary Figure S5. Expression profiles of FlowSOM clusters.**

Density plots show the arcsinh transformed fluorescence intensity of each marker used for FlowSOM clustering for each of the CD8+ T cell clusters.

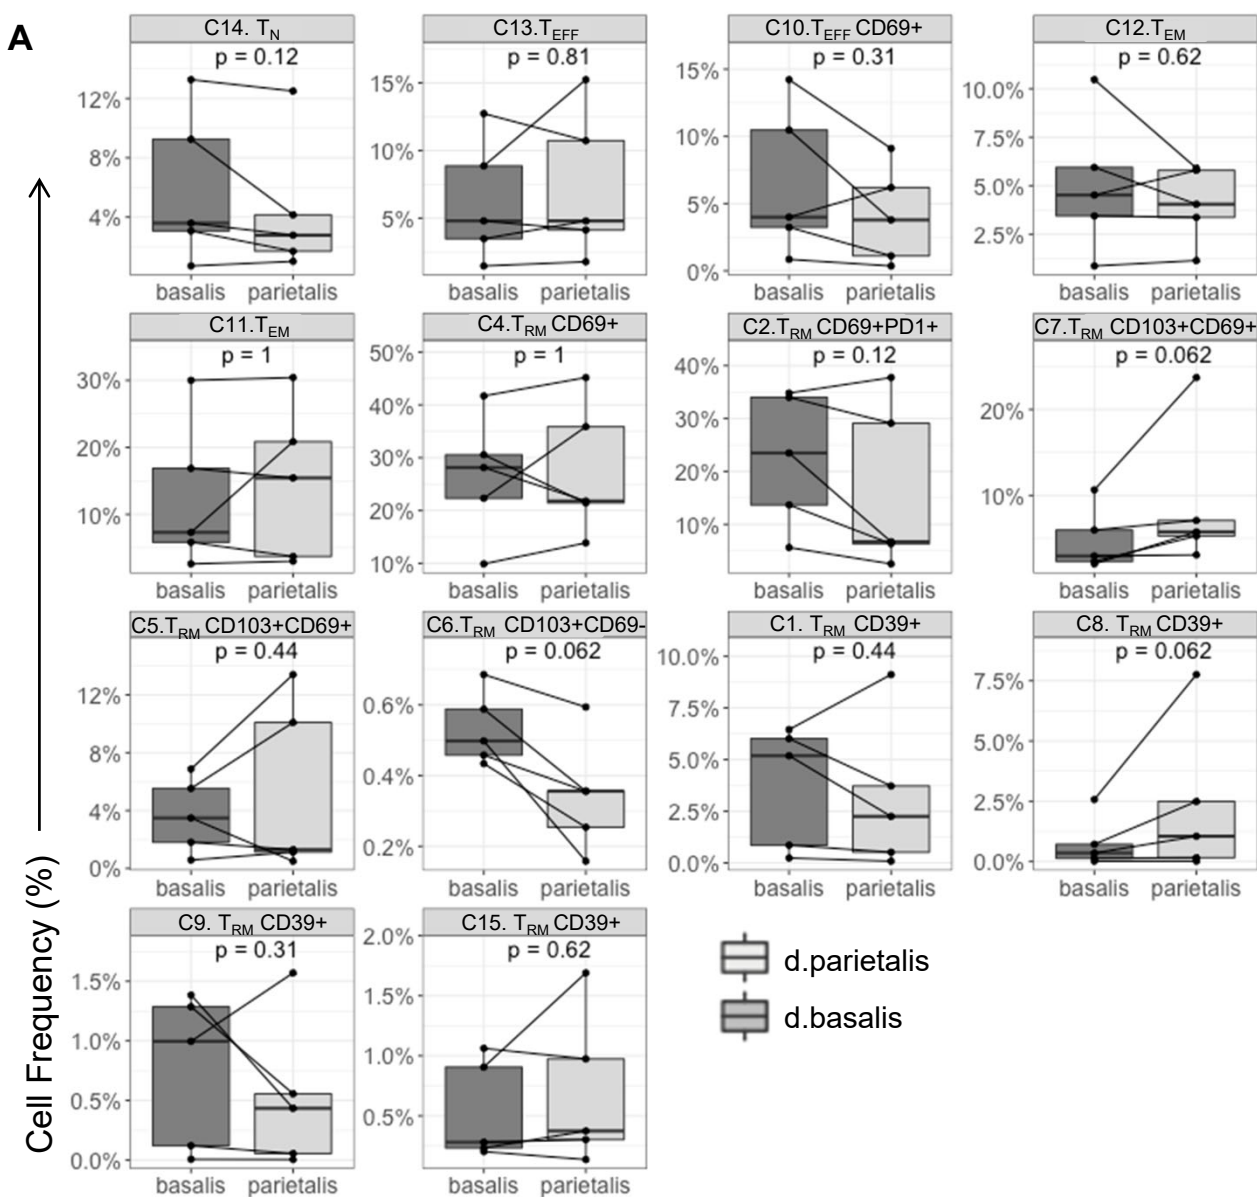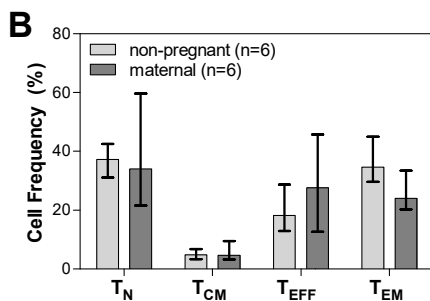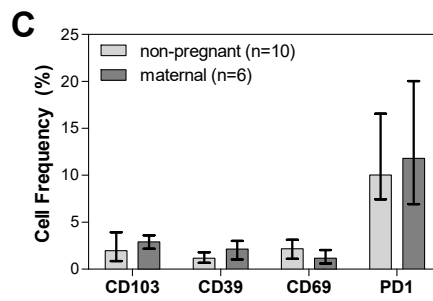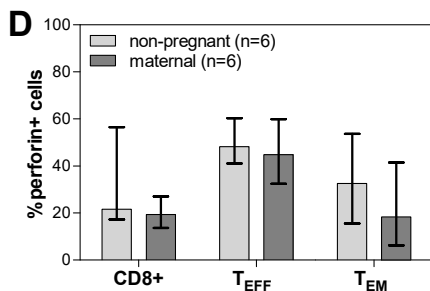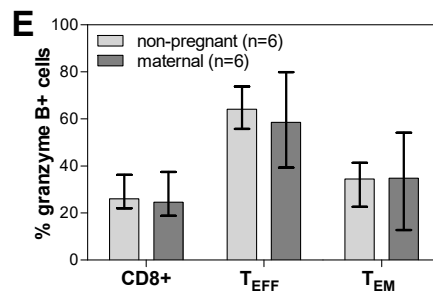

**Supplementary Figure S6. Cell Frequency per cluster are not different between decidua basalis and decidua parietalis nor between non pregnant and pregnant blood CD8+ T cells.**

A) Graphs depict cell frequencies per cluster in decidua basalis and decidua parietalis. Boxes depict median and interquartile range. P. values determined by Wilcoxon signed-rank test. Graphs depict B) the percentage CD45RA+CCR7+  $T_N$ , CD45RA-CCR7+  $T_{CM}$ , CD45RA+CCR7-  $T_{EFF}$ , and CD45RA-CCR7-  $T_{EM}$  cells; and C) the percentage CD103, CD39, CD69 and PD1 positive cells in non-pregnant blood and maternal blood CD8+ T cells. The percentage D) perforin and E) granzyme B positive cells are shown in total CD8+ T cells, CD45RA+CCR7-  $T_{EFF}$ , and CD45RA-CCR7-  $T_{EM}$  CD8+ T cells in non-pregnant and maternal blood. Bars and lines depict median and interquartile range of 6-10 donors.

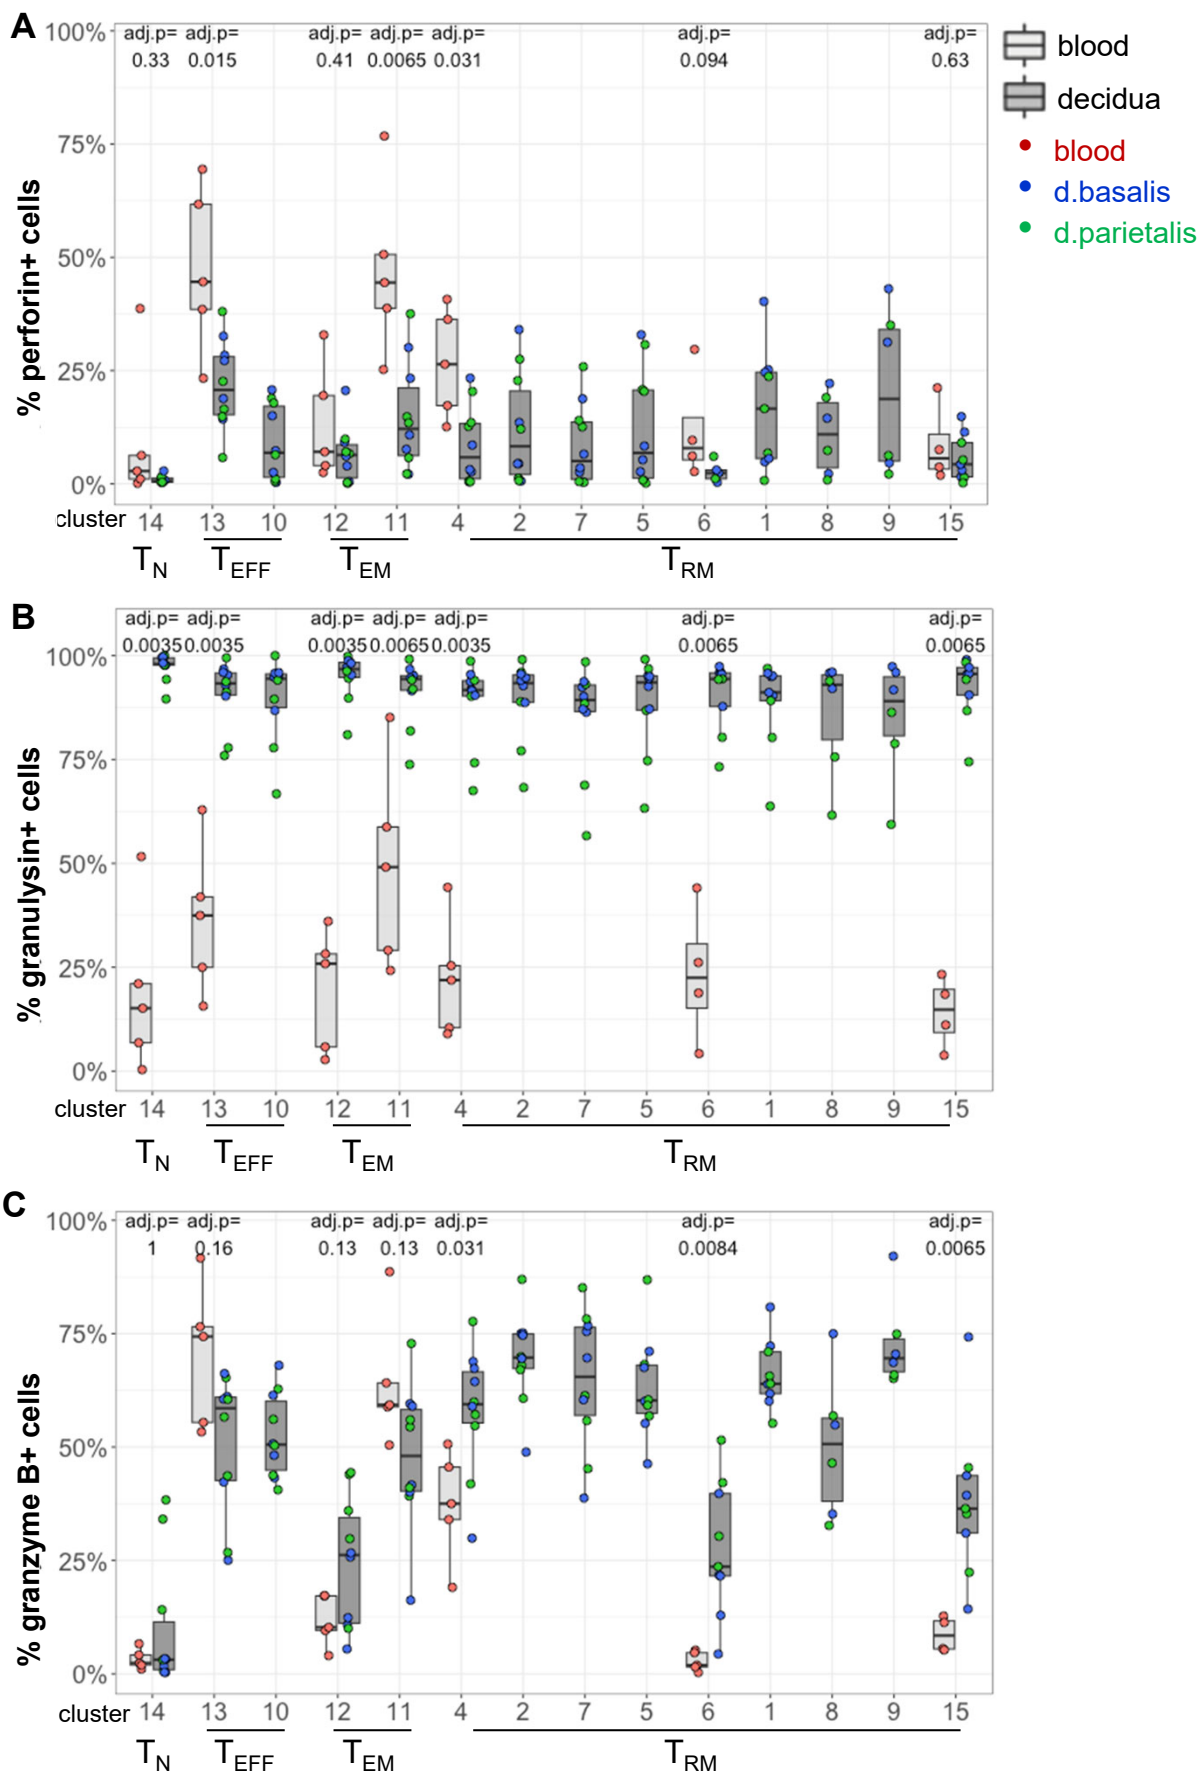

**Supplementary Figure S7. Blood and decidual CD8+ T cell clusters have distinct expression of cytolytic granules.** Graphs depicts the frequency of A) perforin+, B) granulysin+ and C) granzyme B+ cells in the CD8+ T cell clusters present in blood (n=5) (light grey boxes) and d.basalis (n=5) and d.parietalis (n=5) (dark grey boxes). Boxes depict median and interquartile range. P values by Wilcoxon rank sum test and FDR-adjusted.

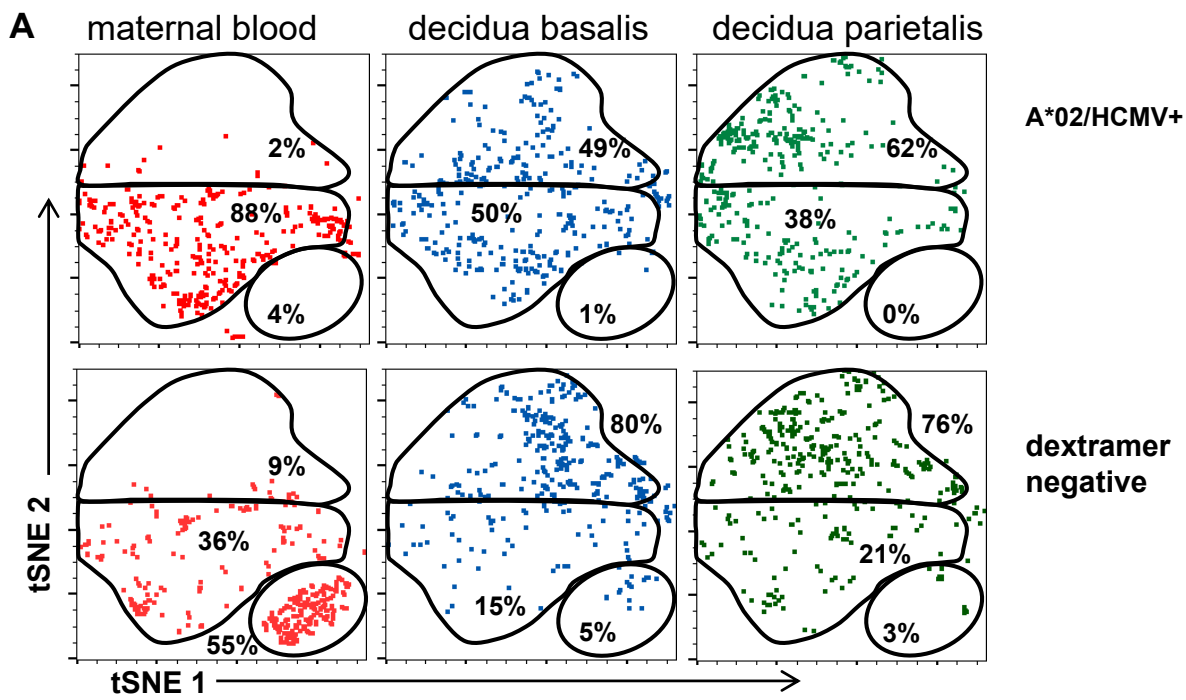

**Supplementary Figure S8. Virus-specific CD8+ T cells are distinct in blood and decidua.** tSNE plots of HLA-A2/HCMV specific cells (top) and dextramer negative cells (bottom) in maternal blood (red), decidua basalis (blue) and decidua parietalis (green) of one donor.

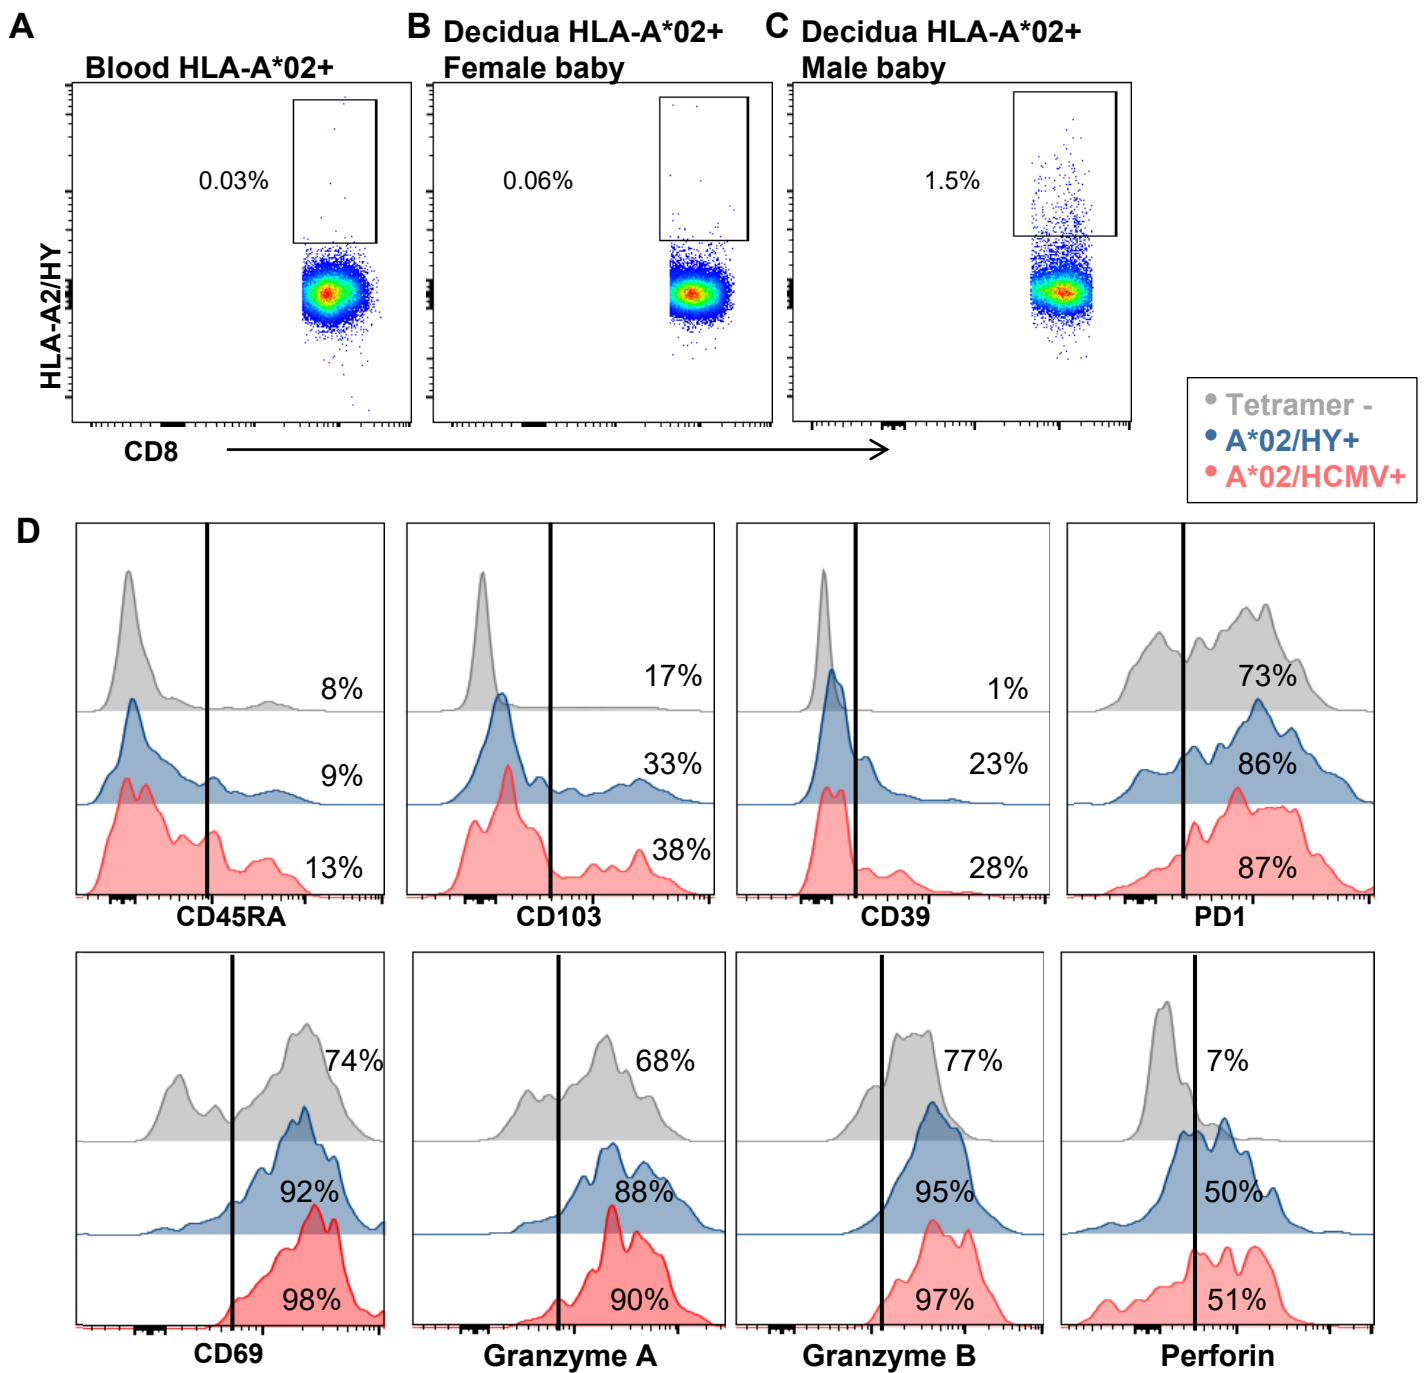

**Supplementary Figure S9. Fetus and virus-specific CD8+ T cells have similar phenotypes.**

Representative FACS plots of HLA-A\*02/HY dextramer staining in A) an HLA-A\*02+ blood donor without any positive HY population B) an HLA-A\*02+ decidua donor after a pregnancy with a female fetus without any positive HY population and C) a HLA-A\*02+ decidua donor after a pregnancy with a male fetus with a clear HY population. D) Representative FACS histograms of CD45RA, CD103, CD39, PD1, CD69, granzyme A, granzyme B and perforin expression in dextramer negative (grey), HLA-A2/HY specific (blue) and HLA-A2/HCMV specific (red) decidual CD8+ T cells.

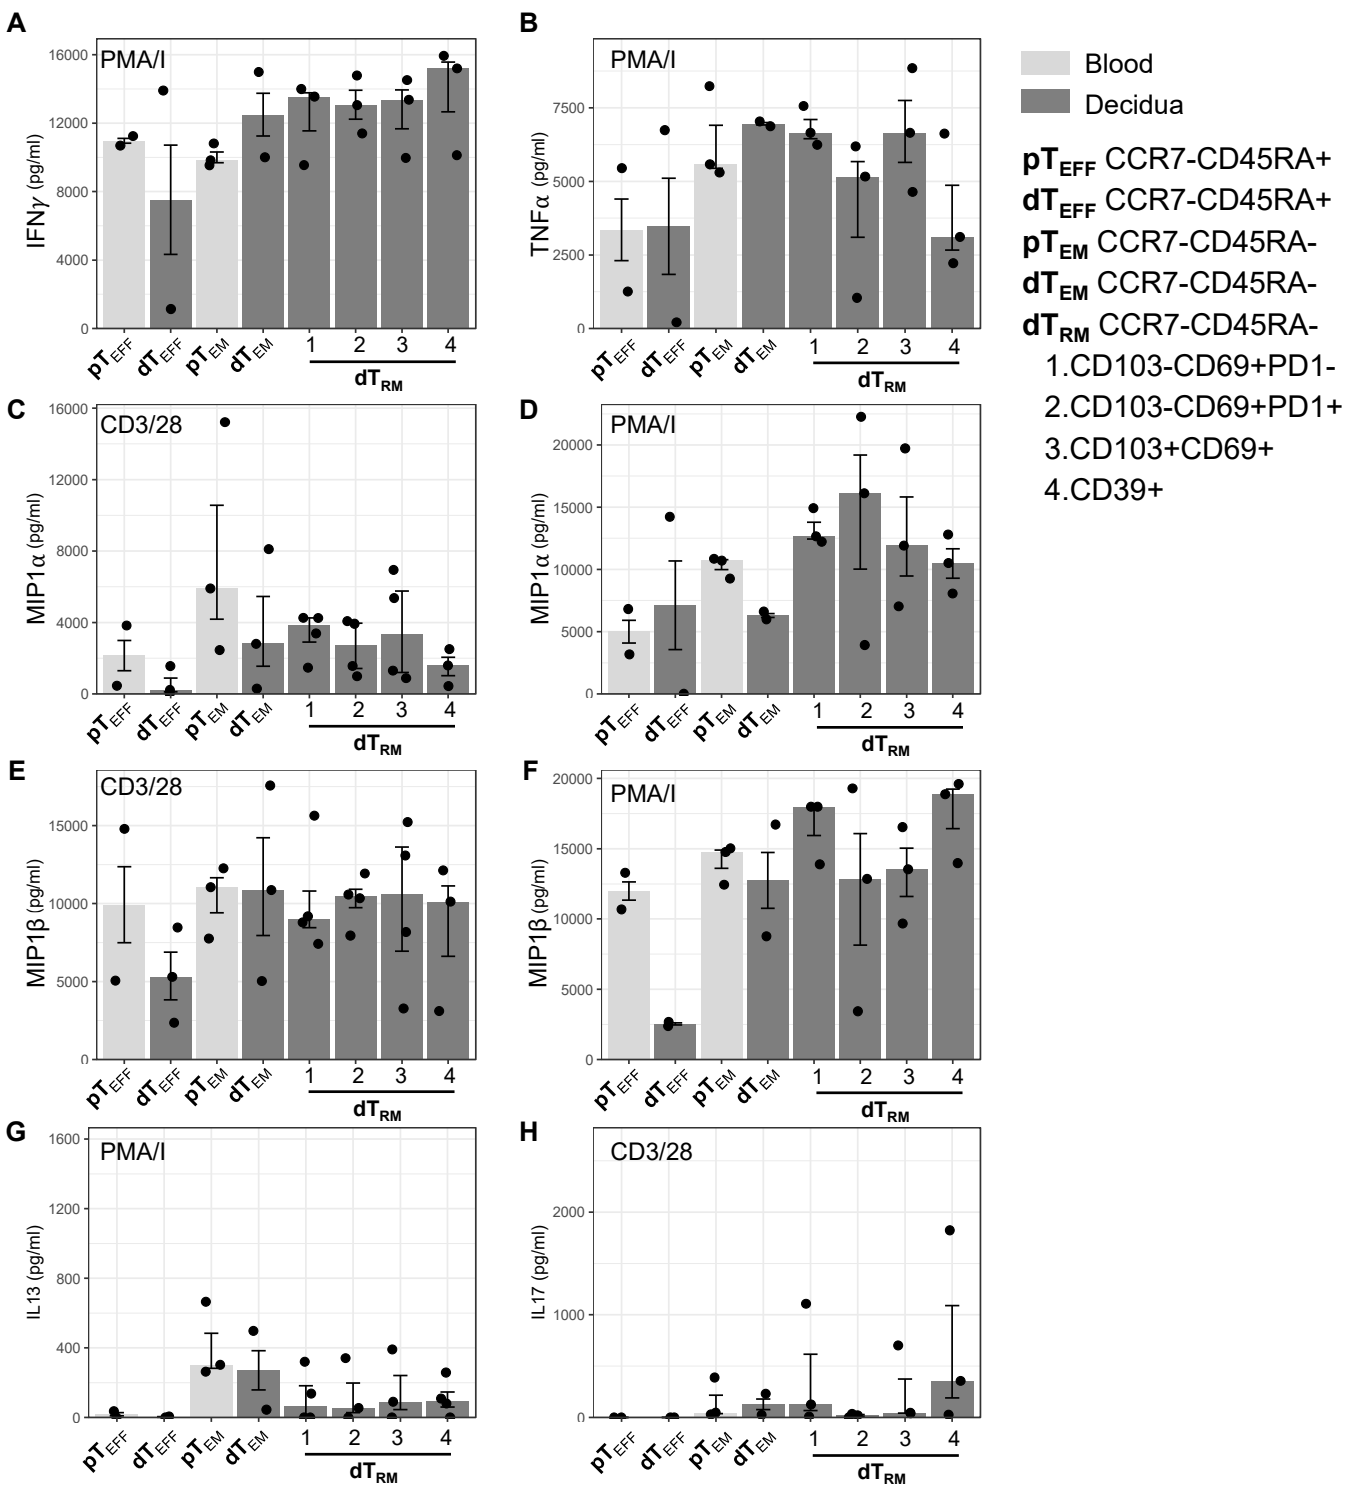

**Supplementary Figure S10. Decidual CD8<sup>+</sup> T<sub>EM</sub> and T<sub>RM</sub> clusters have distinct cytokine secretion profiles.** Graphs depict the concentration of A) IFN $\gamma$ ; B) TNF $\alpha$ ; C-D) MIP1 $\alpha$ ; E-F) MIP1 $\beta$ ; G) IL13 and H) IL17 in the supernatants upon CD3/28 or PMA/I stimulation (as indicated) detected by the Isoplexix human adaptive immune secretome chips. Bars depict median and interquartile range of 2 – 5 donors.

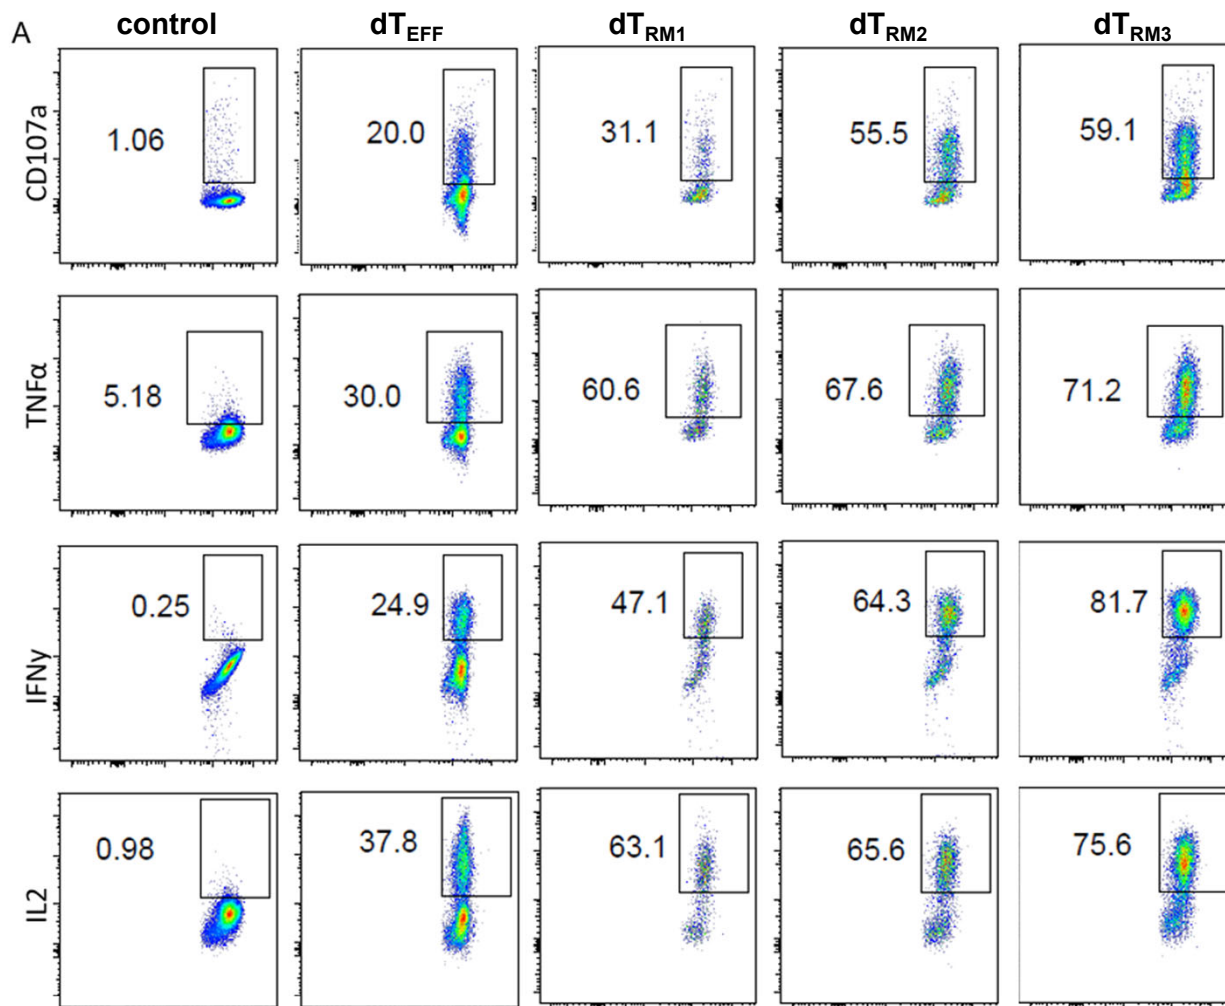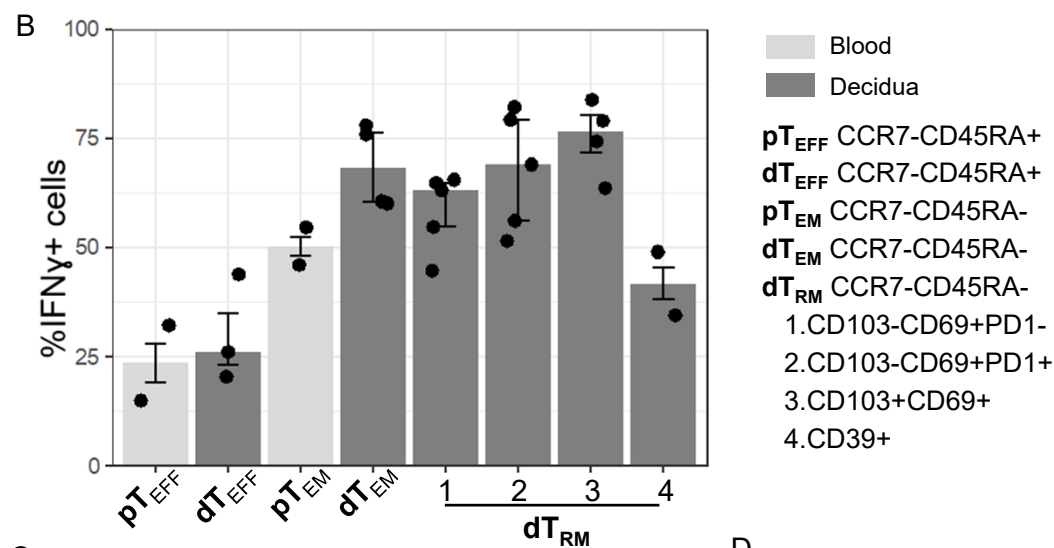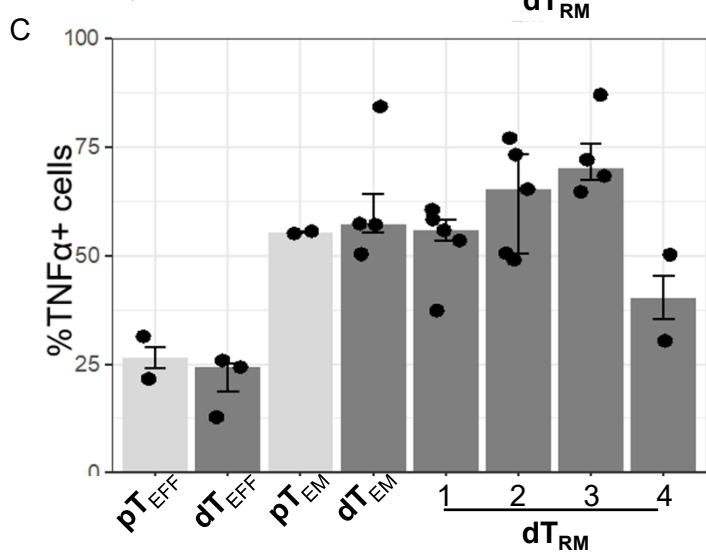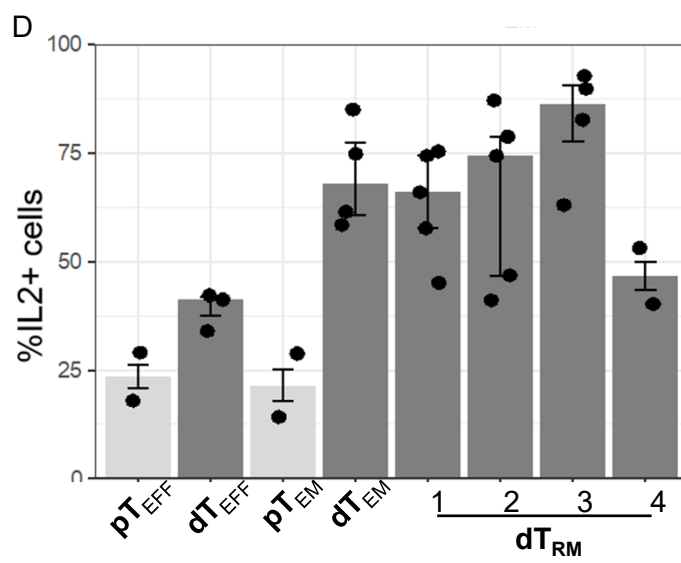

## Supplementary Figure S11 continued

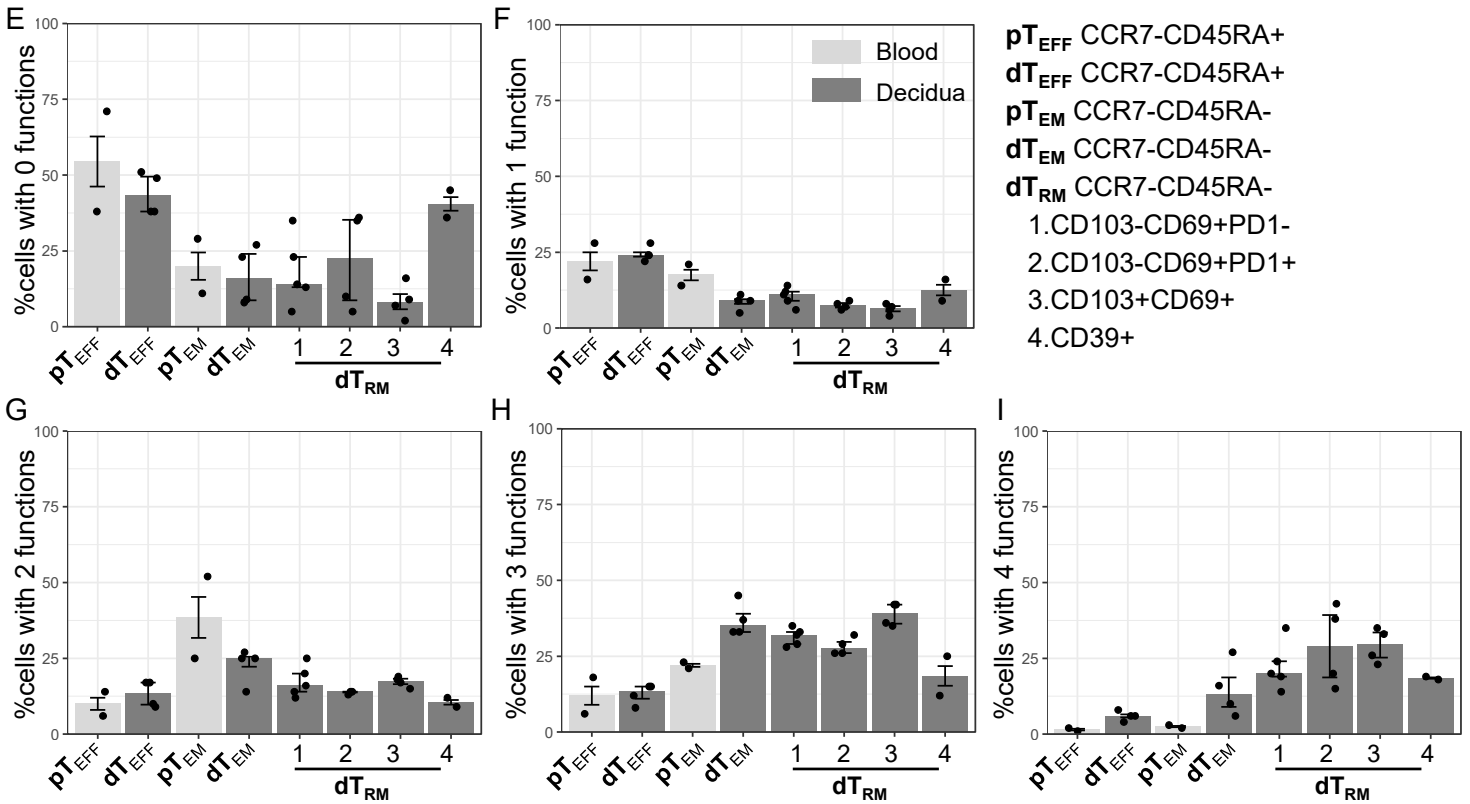

### Supplementary Figure S11. Decidual CD8+ $T_{EM}$ and $T_{RM}$ have distinct levels of poly-functionality

A) Representative FACS plots depicting CD107a, IFN $\gamma$ , TNF $\alpha$ , and IL2 expression in decidual  $T_{EFF}$ ,  $T_{RM1}$ ,  $T_{RM2}$  and  $T_{RM3}$  cells stimulated with PMA/I for 6 hours compared to unstimulated control CD8+ T cells. Graphs depict the percentage of cells within  $T_{EFF}$ ,  $T_{EM}$  and four  $T_{RM}$  types positive for B) IFN $\gamma$ , C) TNF $\alpha$  and D) IL2 as well as the percentage of cells that have E) 0, F) 1, G) 2, H) 3 and I) 4 combined functions (CD107a, IFN $\gamma$ , TNF $\alpha$ , and IL2). Bars depict median and interquartile range of 2 - 5 donors.

| Laser         | Peak | Fluor       | Antigen   |
|---------------|------|-------------|-----------|
| UV<br>355     | UV2  | BUV395      | CD4       |
|               | UV7  | BUV496      | CD56      |
|               | UV14 | BUV737      | CD3       |
|               | UV16 | BUV805      | CD8       |
| VIOLET<br>405 | V1   | BV421       | CD103     |
|               | V3   | P.Blue      | Perforin* |
|               | V7   | BV510       | CD14      |
|               | V10  | BV605       | CD69      |
|               | V11  | BV650       | CD28      |
|               | V13  | BV711       | ICOS      |
|               | V14  | BV750       | CD27      |
| BLUE<br>488   | B2   | AF488       | GNLY*     |
|               | B3   | SB550       | CD45      |
| YG<br>561     | YG1  | PE          | CD25      |
|               | YG3  | PE/Dzle594  | CD39      |
|               | YG5  | PE/Cy5      | CD45RA    |
|               | YG9  | PE/Cy7      | PD1       |
| RED<br>640    | R1   | APC         | GITR      |
|               | R2   | AF647       | GZMB*     |
|               | R4   | AF700       | CCR7      |
|               | R7   | APC/Fire750 | CTLA4*    |

**Supplementary Table S1.** 21 Parameter Cytex Aurora panel.

\*Intracellular Staining

|                | <b>Name</b>       | <b>Phenotype</b>                  | <b>Clusters</b> |
|----------------|-------------------|-----------------------------------|-----------------|
| <b>Blood</b>   | pT <sub>N</sub>   | CD45RA+CCR7+                      | 14              |
|                | pT <sub>EFF</sub> | CD45RA+CCR7-                      | 13              |
|                | pT <sub>EM</sub>  | CD45RA-CCR7-                      | 6, 11, 12, 15   |
| <b>Decidua</b> | dT <sub>N</sub>   | CD45RA+CCR7+                      | 14              |
|                | dT <sub>EFF</sub> | CD45RA+CCR7-                      | 10, 13          |
|                | dT <sub>EM</sub>  | CD45RA-CCR7- CD39-CD103-CD69-PD1- | 11, 12          |
|                | dT <sub>RM1</sub> | CD45RA-CCR7- CD39-CD103-CD69+PD1- | 4               |
|                | dT <sub>RM2</sub> | CD45RA-CCR7- CD39-CD103+CD69+PD1+ | 2               |
|                | dT <sub>RM3</sub> | CD45RA-CCR7- CD39-CD103+CD69+     | 5, 7            |
|                | dT <sub>RM4</sub> | CD45RA-CCR7- CD39+                | 1, 8, 9,15      |

**Supplementary Table S2.** Sorting of CD8+ T cell populations for functional testing

| Antigen                       | Fluor       | Clone     | Company         |
|-------------------------------|-------------|-----------|-----------------|
| CD4                           | BUV395      | M-T477    | BD Biosciences  |
|                               | BV785       | RPA-T4    | Biolegend       |
| CD56                          | BUV496      | NCAM16.2  | BD Biosciences  |
|                               | PE          | HCD56     | Biolegend       |
| CD3                           | BUV737      | UCHT1     | BD Biosciences  |
| CD8                           | BUV805      | RPA-T8    | BD Biosciences  |
|                               | APC         | SKI       | Biolegend       |
|                               | BV510       | HIT8a     | Biolegend       |
| CD103                         | BV421       | Ber-ACT8  | Biolegend       |
| CD14                          | BV480       | MOP9      | BD Biosciences  |
|                               | PerCP       | HCD14     | Biolegend       |
| CD69                          | BV605       | FN50      | Biolegend       |
| CD28                          | BV650       | CD28.2    | Biolegend       |
| ICOS                          | BV711       | C398.4A   | Biolegend       |
| CD27                          | BV750       | O323      | Biolegend       |
| CD45                          | APC-Cy7     | 2D1       | Biolegend       |
|                               | SB550       | 2D1       | Biolegend       |
| CD25                          | PE          | 2A3       | Biolegend       |
| CD39                          | PE/Dzle594  | A1        | Biolegend       |
| CD45RA                        | PE/Cy5      | HI100     | Biolegend       |
| PD1                           | PE/Cy7      | EH12.1    | Biolegend       |
| GITR                          | APC         | DT5D3     | Miltenyi Biotec |
| CCR7                          | A700        | G043H7    | Biolegend       |
|                               | AF488       | G043H7    | Biolegend       |
| TIGIT                         | PerCP/eF710 | MBSA43    | Biolegend       |
| CTLA4                         | APC/Fire750 | BNI3      | Biolegend       |
| GZMB                          | A488        | 351927    | Invitrogen      |
| GNLY                          | A647        | DH2       | Biolegend       |
| Perforin                      | P.Blue      | DG9       | Biolegend       |
| IFN $\gamma$                  | APC         | 4S.B3     | Biolegend       |
| TNF $\alpha$                  | P.Blue      | MAb11     | Biolegend       |
| IL-2                          | PE          | MQ1-17H12 | Biolegend       |
| CD107a                        | PerCP/CY5.5 | H4A3      | Biolegend       |
| Caspase 3/7 detection reagent | Green       | N/A       | Invitrogen      |
| HLA-A*02:01_HCMV_NLVPMVATV    | FITC        | N/A       | Immudex,Denmark |
| HLA-A*02:01_HY_FIDSYICQV      | PE          | N/A       | Immudex,Denmark |

**Supplementary Table 3. List of Antibody's used.**
